# Supplementary material
Source: Springer Nature journal article supplement (https://www.springermedizin.de/resource/supplementary/13014_2007_90_MOESM3_ESM.pdf/9632898)

100%  
90%  
50%

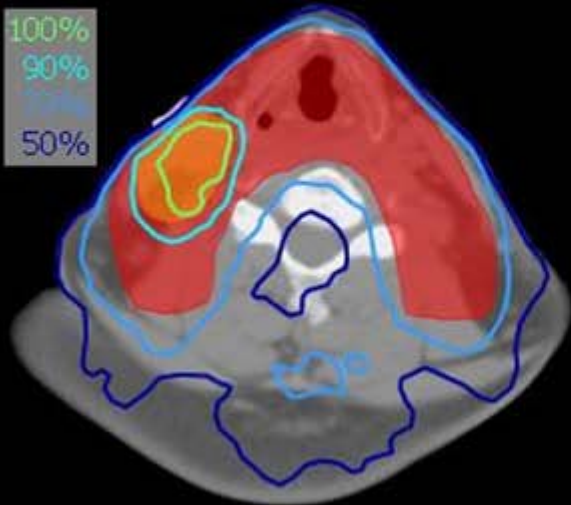

100%  
90%  
50%

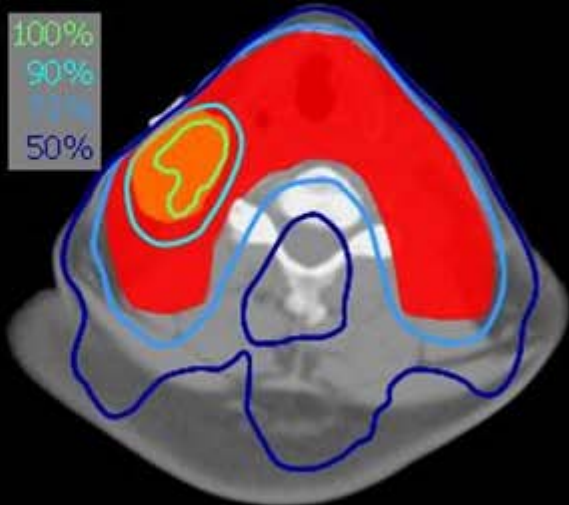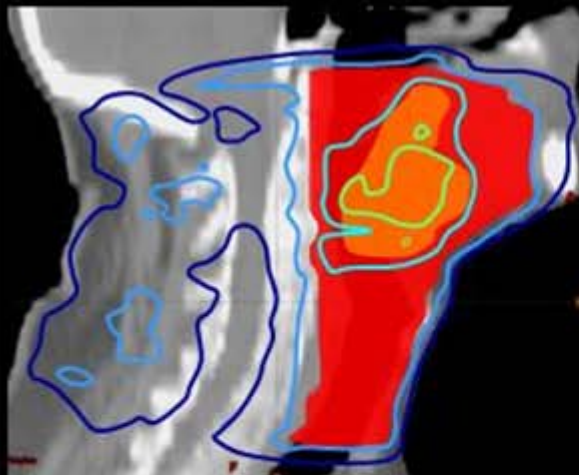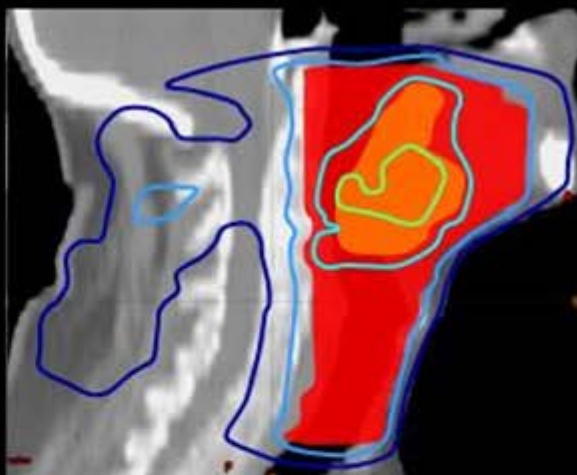

Supplement: MOESM3 [file 9632898]
